# Supplementary material for: The Ca2+-Regulated Protein Kinase CIPK1 Modulates Plant Response to Nitrate Deficiency in Arabidopsis
Source: MDPI journal article supplement (doi:10.3390/genes15091235), 2024-09-23
Supplement: s1 [file genes-3208561-supplementary.pdf › genes-3208561-supplementary.pdf]

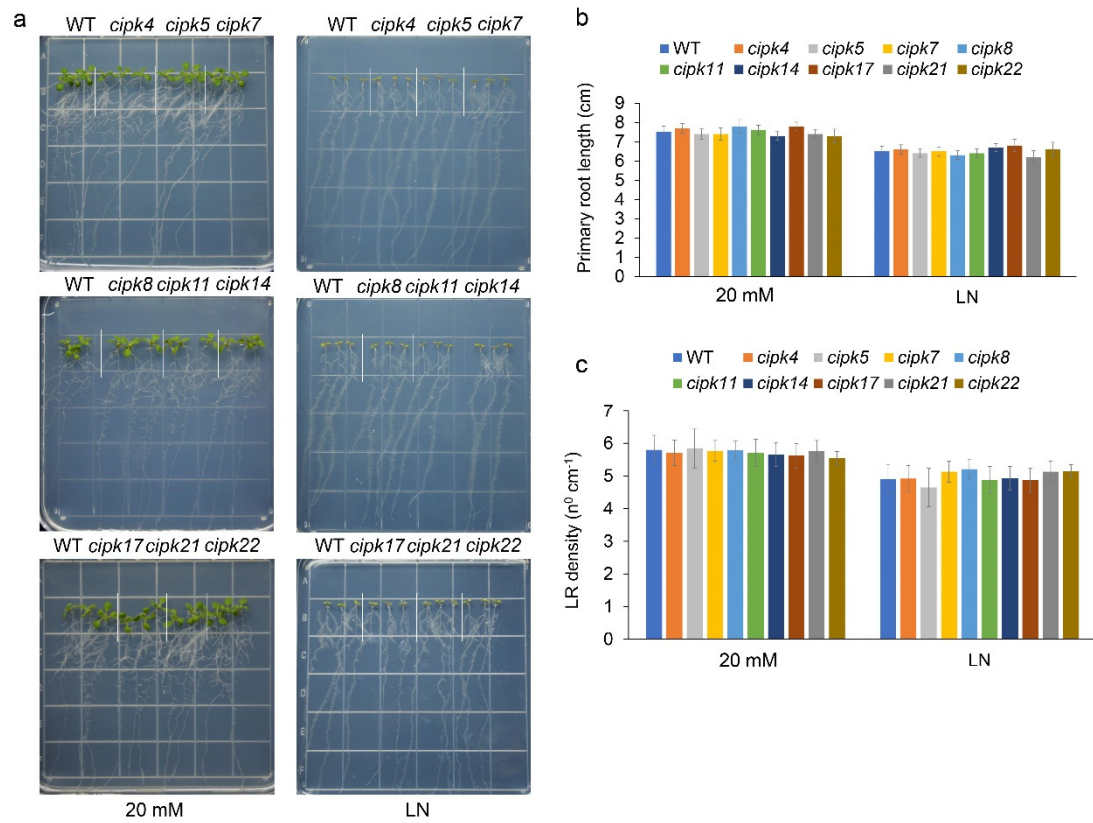

**Figure S1.** Phenotypic analysis of the *cipks* mutant germinated on LN medium. (a) Phenotypic analysis of the *cipk4*, *cipk5*, *cipk7*, *cipk8*, *cipk11*, *cipk14*, *cipk17*, *cipk21* and *cipk22* mutants germinated from 0, 0.05, 0.1, 1, and 20 mM  $\text{NO}_3^-$ . (b) Primary root length of the tested lines under the different nitrate treatments ( $n = 24$ ). (c) Lateral root density under the different nitrate treatments ( $n = 24$ ). Error bars represent means  $\pm$  S.E. Asterisks indicate statistically significant differences according to *t*-test.

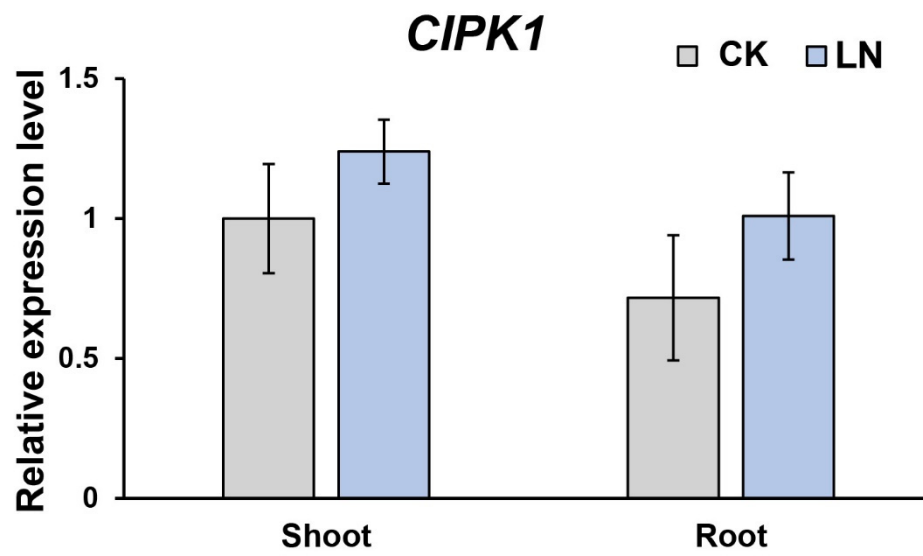

**Figure S2.** Expression of *CIPK1* in response to nitrate deficiency. Expression of *CIPK1* in shoot and root are analysed under nitrate deficiency. ( $n = 24$ ). Error bars represent means  $\pm$  S.E. Asterisks indicate statistically significant differences according to *t*-test.

**Table S1.** Primers used in RT-PCR

| Primer          | Sequence (5'-3')          |
|-----------------|---------------------------|
| <i>Actin-F</i>  | TTCAGCTTCATCGGCCGTTGCATT  |
| <i>Actin-R</i>  | CATCAGCATCGGCCATGGTCTACGA |
| <i>NRT1.1-F</i> | TCATCGCCGATACCTTTCTC      |
| <i>NRT1.1-R</i> | CGGAATTGTTTCAGTGTGTGG     |
| <i>NRT2.1-F</i> | TCCACAGATCCAGTGAAAGGTAC   |
| <i>NRT2.1-R</i> | TGACTTGGCGTTCTCGGCA       |
| <i>NRT2.2-F</i> | TTGCTGATGGAGCCAAGACC      |
| <i>NRT2.2-R</i> | TCAATGACACATGATCAAGCATTG  |
| <i>NRT2.4-F</i> | GCTTGTGGAGCTACCTTTGC      |
| <i>NRT2.4-R</i> | GAAGTTTCCACCAGCTCCAG      |
| <i>NRT2.5-F</i> | AGGATCGACATACACGAGAGAGACG |
| <i>NRT2.5-R</i> | GGCTCCGATATGTAAGTTCTTTTC  |
| <i>NAR2.1-F</i> | GACCTGCCCACACAAGATCA      |
| <i>NAR2.1-R</i> | TGGAGGCAATATCTAGGGACGC    |
